# Supplementary material
Source: publisher figshare collection journal article supplement (https://diabetesjournals.figshare.com/articles/dataset/_/14770083)
Supplement: Supplementary file 1 [file 3]

## Supplementary Table S1. Type 1 Diabetes TrialNet Study Group

### Personnel as of 12/3/2020.

**Steering Committee:** Carla J. Greenbaum (Benaroya Research Institute), Mark Anderson (University of California, San Francisco), Mark A. Atkinson (University of Florida), Emanuele Bosi (San Raffaele University), Todd Brusko (University of Florida), Jane Buckner (Benaroya Research Institute), Mark Clements (The Children's Mercy Hospital), Peter G. Colman (Walter & Eliza Hall Institute of Medical Research), Mark Daniels (Children's Hospital of Orange County), Linda DiMeglio (Indiana University), Carmella Evans-Molina (Indiana University), Jason Gaglia (Joslin Diabetes Center), Stephen E. Gitelman (University of California, San Francisco), Robin Goland (Columbia University), Peter Gottlieb (Barbara Davis Center for Childhood Diabetes), Michael Haller (University of Florida), Kevan Herold (Yale University), Martin Hessner (Medical College of Wisconsin), Mikael Knip (University of Helsinki), Jeffrey P. Krischer (University of South Florida), Åke Lernmark (Skane University Hospital), Megan Levings (University of British Columbia), Ingrid Libman (University of Pittsburgh), Yuk-Fun Liu (University of Bristol), Peter Linsley (Benaroya Research Institute), Alice Long (Benaroya Research Institute), Wayne Moore (The Children's Mercy Hospital), Antoinette Moran (University of Minnesota), Andrew Muir (Emory Children's Center), Priya Pralahad (Stanford University), William Russell (Vanderbilt Eskind Diabetes Clinic), Lisa Spain (National Institute of Diabetes and Digestive and Kidney Diseases [NIDDK]), Andrea Steck (Barbara Davis Center for Childhood Diabetes), John Wentworth (Walter & Eliza Hall Institute of Medical Research), Diane Wherrett (University of Toronto), Perrin White (University of Texas Southwestern), Darrell M. Wilson (Stanford University), William Winter (University of Florida), Anette Ziegler (Technical University Munich).

**Past Members:** Peter Antinozzi (Wake Forest University), David A. Baidal (University of Miami), Manuela Battaglia (San Raffaele University), Dorothy Becker (University of Pittsburgh), Penelope Bingley (University of Bristol), Richard Insel (JDRF), Thomas Kay (St. Vincent's Institute of Medical Research), Jennifer B. Marks (University of Miami), Jerry Palmer (University of Washington), Mark Peakman (King's College), Louis Philipson (University of Chicago), Alberto Pugliese (University of Miami), Philip Raskin (University of Texas Southwestern), Maria Redondo (Baylor College of Medicine), Henry Rodriguez (University of South Florida Diabetes and Endocrinology Center), Bart Roep (Leiden University Medical Center), Desmond A. Schatz (University of Florida), Jay S. Skyler (University of Miami), Jay M. Sosenko (University of Miami), Jorma Toppari (Hospital District of Southwest Finland).

**Executive Committee:** Carla J. Greenbaum (Benaroya Research Institute), Jeffrey P. Krischer (University of South Florida), Ellen Leschek (National Institute of Diabetes and Digestive and Kidney Diseases [NIDDK]), Lisa Spain (National Institute of Diabetes and Digestive and Kidney Diseases [NIDDK]).

**Past Members:** Katarzyna Bourcier (National Institute of Allergy and Infectious Diseases [NIAID]), Richard Insel (JDRF), John Ridge (National Institute of Allergy and Infectious Disease [NIAID]), Jay S. Skyler (University of Miami).

**Chair's Office:** Carla J. Greenbaum (Benaroya Research Institute), Lisa Rafkin (University of Miami).

**Past Members:** Irene Santiago (University of Miami), Jay S. Skyler (University of Miami), Jay M. Sosenko (University of Miami).

**TrialNet Coordinating Center (University of South Florida):** Jeffrey P. Krischer, Brian Bundy, Michael Abbondandolo, Logan Alford, Matthew Boonstra, Cristina Burroughs, Jessica Conaty, David Cuthbertson, Christopher Eberhard, Steve Fiske, Julie Ford, Jennifer Garmeson, Cameron Hainline, Brian Hays, Kathleen Heyman, Belinda Hsiao, Christina Karges, Shu Liu, Kristin Maddox, Colleen Maguire, Jamie Malloy, Cameron McNeill, Margaret Moore, Sarah Muller, Thuy Nguyen, Ryan O'Donnell, Melissa Parker, MJ Pereyra, Roy Tamura, Elon Walker-Veras, Lu You, Kenneth Young.

**Past Members:** Timothy Adams, Darlene Amado, Ilma Asif, Jenna Bjellquist, Laura Bocchino, Mario Cleves, Meagan DeSalvatore, Susan Geyer, Courtney Henderson, Martha Henry, Amanda Kinderman, Beata-Gabriela Koziol, Lindsay Lane, Ashley Leinbach, Jennifer Lloyd, Julie Martin, Jessica Miller, Jodie Nunez, Nichole Reed, Amy Roberts, Kelly Sadler, Tina Stavros, Christine Sullivan, Megan V. Warnock, Keith Wood, Rebecca Wood, Ping Xu, Vanessa Yanek.

**National Institute of Diabetes and Digestive and Kidney Diseases [NIDDK]:** Ellen Leschek, Lisa Spain.

**Data Safety and Monitoring Board:** Emily Blumberg (University of Pennsylvania), Sean Aas (Georgetown University), Gerald Beck (Cleveland Clinic Foundation), Rose Gubitosi-Klug (Case Western Reserve University), Dennis Wallace (Research Triangle Institute).

**Past Members:** David Brillon (Cornell University), Lori Laffel (Joslin Diabetes Center), Robert Veatch (Georgetown University), Robert Vigersky (Medtronic).

**Infectious Disease Safety Committee:** Brett Loechele (Children's National Medical Center), Lindsey Baden (Brigham and Women's Hospital), Nora Bryant (Joslin Diabetes Center), Michael Green (University of Pittsburgh), Ingrid Libman (University of Pittsburgh), Yuk-Fun Liu (University of Bristol), Adriana Weinberg (University of Colorado), John Wentworth (Walter & Eliza Hall Institute of Medical Research).

**Past Members:** Peter Gottlieb (Barbara Davis Center for Childhood Diabetes), Ellen Leschek (National Institute of Diabetes and Digestive and Kidney Diseases [NIDDK]).

**Laboratory Directors:** Santica Marcovina (University of Washington), Michael Steffes (University of Minnesota), Adriana Weinberg (University of Colorado), William Winter (University of Florida), Liping Yu (Barbara Davis Center for Childhood Diabetes).

**Past Members:** Jerry P. Palmer (University of Washington), Jay Tischfield (Rutgers University).

**TrialNet Clinical Network Hub (Benaroya Research Institute):** Annie Shultz, Emily Batts, Arielle Pagryzinski, Mary Ramey, Diana Skye, Michele Staal.

**Past Members:** Kristin Fitzpatrick, Randy Guerra, Melita Romasco, Meghan Tobin, Christopher Webb.

**Active Personnel at Clinical Centers Participating in the TN01 Protocol:**

**Barbara Davis Center for Childhood Diabetes, Aurora, Colorado:** Andrea K. Steck, Brenda Bradfield, Hali Broncucia, Lexie Chesshir, Peter A. Gottlieb, Nancy Kunzie, Aaron W. Michels, Marian J. Rewers, Becky Robinson, Sona Seligova, Kimber Simmons, Morgan Sooy, Taylor Triolo, Ruthie Williamson.

**Baylor College of Medicine, Houston, Texas:** Maria J. Redondo, Massimo Pietropaolo, Susan Pietropaolo, Mustafa Tosur.

**Benaroya Research Institute, Seattle, Washington:** Carla J. Greenbaum, Jane H. Buckner, Wei Hao, David Kook, Sandra Lord, Mary Ramey, Michael Richter, Elaine Sachter, Corinna Tordillos, Dana VanBuecken, Kimberly Varner.

**The Children's Mercy Hospital, Kansas City, Missouri:** Mark Clements, Wayne Moore, Fadi Al Muhaisen, Marissa Beidelschies, Jennifer Boyd, Darlene Brenson-Hughes, Jennifer Dolan, Aliza Elrod, Emily Haith, Kelsee Halpin, Kelsye Howell, Jennifer James, Laura Jones, Terri Luetjen, Cassandra McClain, Ryan McDonough, Susan Mitchell, Steve Orlich, Emily Paprocki, Barbara Seufferling, Britaney Spartz.

**Columbia University, New York, New York:** Robin Goland, Analia Alvarez, Magdalena Bogun, Rachelle Gandica, Jacqueline Lonier, Sarah Pollak, Kristen Williams.

**Emory Children's Center, Atlanta, Georgia:** Andrew Muir, Amber Antich, Kristina Cossen, Eric Felner, Lynette Gonzalez, Margaret Jenkins, Brittney Powell-Lee, Wanda Sanchez, Catherine Simpson.

**The Hospital for Sick Children, Toronto, Ontario:** Diane K. Wherrett, Lindsay Demoe, Lesley Eisel, Roze Kovalakovska, Rebecca Stochinsky, Mary Jo Ricci.

**Indiana University, Indianapolis, Indiana:** Linda A. DiMeglio, Carmella Evans-Molina, Eric Grubbs, Marimar Hernandez-Perez, Heba M. Ismail, Megan Legge, America Newnum, Juan Sanchez, Emily K. Sims, Maria Spall, Stephanie Woerner.

**San Raffaele Hospital, Milan, Italy:** Emanuele Bosi, Eleonora Bianconi, Andrea Bolla, Ricardo Bonfanti, Amelia Caretto, Giulio Frontino, Pauline Grogan, Andrea Laurenzi, Chiara Molinari, Matteo Pastore, Alessandra Petrelli.

**Skane University Hospital, Scania, Sweden:** Åke Lernmark, Linda Ahlkvist, Henrik Borg, Anastasia Katsarou, Helena Larsson, Markus Lundgren, Ulrika Ulvenhag.

**Stanford University, Stanford, California:** Darrell M. Wilson, Priya Prahalad, Tandy Aye, Laura Bachrach, Trudy Esrey.

**Technical University Munich, Munich, Germany:** Anette Ziegler, Peter Achenbach, Melanie Bunk, Melanie Herbst, Anna Hofelich, Benjamin Marcus, Claudia Ramminger, Franziska Reinmüller, Katharina Warncke, Tiziana Welzhofer.

**University of Bristol, Bristol, England:** Yuk-Fun Liu, Danijela Tatovich, Vicky King, Sam Loud, Beth Thorne.

**University of California, San Francisco, California:** Stephen E. Gitelman, Fatema Abdulhussein, Natalie Aceves, Mark S. Anderson, Jeanne Buchanan, Hannah Chesser, Abby Cobb-Walch, Laura Dapkus, Karen Ko, Janet Lee, Roger Long, Isabella Niu, Srinath Sanda, Caroline Schulmeister, Lorraine Stiehl, Christine Torok, Rebecca Wesch, Jenise Wong.

**University of Chicago, Chicago, Illinois:** Louis Philipson, Rabia Ali, Colleen Bender, Diane Deplewski, Gail Gannon, Siri Greeley, Leon Jones, Michelle Lemelman, Cristy Miles, Rochelle Naylor, Katie O'Sullivan, Christine Yu.

**University of Florida, Gainesville, Florida:** Michael J. Haller, Annie Abraham, Janey Adams, Anastasia Albanese-O'Neill, Mark A. Atkinson, Brittany Bruggeman, Todd M. Brusko, Michael J. Claire-Salzler, Kristin Dayton, Paul Hiers, Jennifer Hosford, Laura M. Jacobsen, John Marks, Henry Rohrs, Desmond A. Schatz, Janet Silverstein, Paula Towe, William E. Winter, Chelsea Zimmerman.

**University of Helsinki, Helsinki, Finland:** Mikael Knip, Minna Hirvasniemi, Katriina Koski, Kristiina Luopajarvi, Heli Siljander, Riitta Veijola.

**University of Miami, Miami, Florida:** David A. Baidal, Carlos Blaschke, Della Matheson, Janine Sanchez, Natalia Sanders-Branca, Jay S. Skyler, Jay M. Sosenko.

**University of Minnesota, Minneapolis, Minnesota:** Antoinette M. Moran, Shannon Beasley, Melena D. Bellin, Janice Leschyshyn, Jennifer McVean, Brandon M. Nathan, Brittney Nelson, Beth Pappenfus, Jessica Ruedy, Anne Street, Darcy Weingartner.

**University of Pittsburgh, Pittsburgh, Pennsylvania:** Ingrid M. Libman, Dorothy J. Becker, Kelli DeLallo, David Groscost, Mary Beth Klein, Karen Riley, Carly Shelleby, Frederico Toledo.

**University of Texas Southwestern, Dallas, Texas:** Perrin White, Lauren Boyles, Yasmin Dominguez, Lindsay Harter, Philip Raskin.

**University of South Florida Diabetes and Endocrinology Center, Tampa, Florida:** Henry Rodriguez, Ciara Alverex, Sureka Bollepalli, Jerry Brown, Rachel Brownstein, Madeline Candelario-Cosme, Allison Castro, Tatiana Cruz, Emily Eyth, Max Feldman, Rachel Franks, Danielle Gomez, Lucy Guerra, Crystal Jacovino, Verena Jorgensen, Byron Moran, Hugo Navarte, Asa Oxner, Jesus Penabad, Marla Sevilla-Alsina, Dorothy Shulman, Sheryl Tindell.

**Vanderbilt Eskind Diabetes Clinic, Nashville, Tennessee:** William E. Russell, Faith Brendle, Anne Brown, Brenna Hammel, Jenny Leshko, Daniel J. Moore, Eric Pittel, Kimberly Rainer, Tyler Smith, James W. Thomas, George Williams, Sarah Wright.

**Walter and Eliza Hall Institute of Medical Research, Parkville, Victoria:** Peter Colman, John M. Wentworth, Marika Bjoransen, Spiros Furlanos, Leonard C. Harrison, Felicity Healy, Leanne Redl, Rebecca Sweet.

**Yale University, New Haven, Connecticut:** Kevan C. Herold, Laurie Feldman, Robert Sherwin, William V. Tamborlane, Stuart A. Weinzimer.
