# Supplementary material
Source: publisher figshare collection journal article supplement (https://diabetesjournals.figshare.com/articles/dataset/_/14770083)

Supplementary Figure S1. Consort Diagram that Illustrates Selection of Participants for Analysis

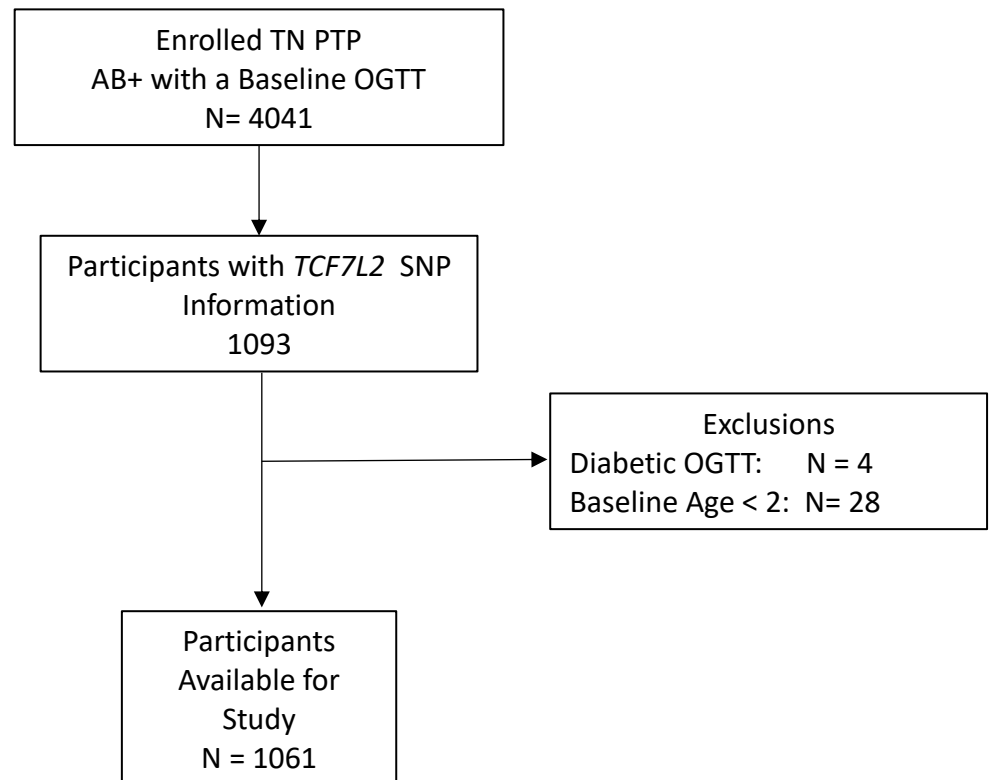

Supplementary Figure S2. Comparison of Age and Sex Adjusted BMI Z Score by *TCF7L2* Genotype.

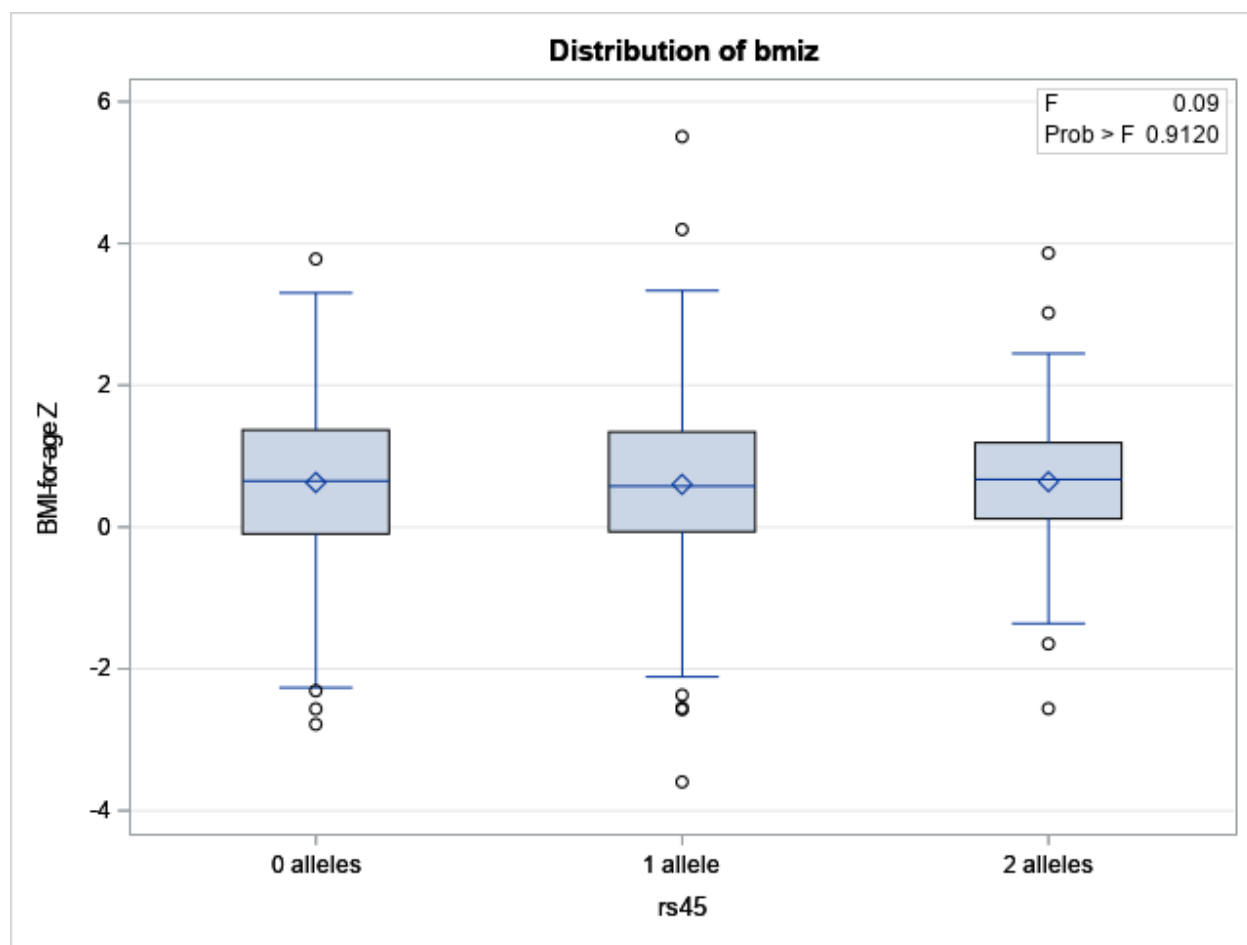

Supplement: Supplementary file 2 [file 3]
