# Supplementary material
Source: publisher figshare collection journal article supplement (https://diabetesjournals.figshare.com/articles/dataset/_/14770083)
Supplement: Supplementary file 3 [file 3]

Supplementary Table S2. Overall Characteristics of Autoantibody-positive Relatives

| Characteristics                                  | N=1,061     |
|--------------------------------------------------|-------------|
| Age (Years)                                      | 16.3±13.0   |
| Age <18 years old: N (%)                         | 768 (72.4%) |
| Male: N (%)                                      | 504 (47.7%) |
| Non-Hispanic: N (%)                              | 932 (91.1%) |
| BMI Z-score                                      | 0.6 ±1.1    |
| Abnormal OGTT (%)                                | 318 (30.0%) |
| <i>TCF7L2</i> SNP: T2D-associated alleles: N (%) |             |
| 0 alleles                                        | 510 (48.1%) |
| 1 allele                                         | 466 (43.9%) |
| 2 alleles                                        | 85 (8.0%)   |

Values are mean ±SD except if otherwise noted. Missing values: BMI Z-score: N=68, ethnicity: N=38, sex: N=4

Supplementary Table S3. Interaction between BMI and *TCF7L2* SNP in Autoantibody-positive Relatives

| Age group (Separate models) | Interaction term               | Dependent outcomes |                        |        |
|-----------------------------|--------------------------------|--------------------|------------------------|--------|
|                             | BMI* <i>TCF7L2</i> 0 alleles v | 1/I <sub>F</sub>   | 30-min C-Peptide Index | oDlc   |
| All ages                    | 1 or 2 alleles                 | 0.5822             | 0.6845                 | 0.7276 |
| Adults                      | 1 or 2 alleles                 | 0.9704             | 0.7924                 | 0.9056 |
| Children                    | 1 or 2 alleles                 | 0.6765             | 0.8248                 | 0.5832 |

P-values for interaction terms. All models include BMI Z-score and *TCF7L2*. P-values under the Bonferroni-corrected level of significance of p-values <0.0086 are bolded.

Supplementary Table S4: Analysis with unrelated participants only (n=1,022), after exclusion of n=39 individuals from 35 multi-member families. For families with more than one relative, only one relative, selected at random, has been included.

**Table S4-A.** Univariable Analysis (N=1,022)

| Predictor                           | 1/I <sub>F</sub>                       | 30-min C-peptide index                | Disposition index (original)       | Disposition index (corrected)          |
|-------------------------------------|----------------------------------------|---------------------------------------|------------------------------------|----------------------------------------|
| Age                                 | <b>&lt;0.0001</b><br><i>r</i> =-0.3208 | <b>&lt;0.0001</b><br><i>r</i> =0.3747 | 0.0591<br><i>r</i> =0.0724         | <b>&lt;0.0001</b><br><i>r</i> =-0.1974 |
| BMI Z-score                         | <b>&lt;0.0001</b><br><i>r</i> =-0.4416 | <b>&lt;0.0001</b><br><i>r</i> =0.2737 | <b>0.0003</b><br><i>r</i> =-0.1433 | <b>&lt;0.0001</b><br><i>r</i> =-0.3655 |
| Ethnicity (Non-Hispanic v Hispanic) | <b>0.0010</b><br>NH > H                | 0.0109<br>NH > H                      | 0.6086                             | <b>0.0139</b><br>NH > H                |
| Sex (Male v Female)                 | 0.0652                                 | 0.0184                                | 0.9917                             | 0.1675                                 |
| <i>TCF7L2</i> (1 or 2 v 0 alleles)  | 0.2043                                 | 0.8073                                | 0.7516                             | 0.2549                                 |

Numbers represent p-values except where noted. For statistically significant correlations, Spearman correlation coefficients (*r*) are shown for continuous variables and direction of difference for categorical variables. P-values under the Bonferroni-corrected level of significance of p-values <0.0086 are bolded.

**Table S4-B.** Multivariable Analysis for Each Dependent Outcome (All Ages, N=1,022)

| Predictor                           | Dependent outcome                |                                 |                                  |                                  |
|-------------------------------------|----------------------------------|---------------------------------|----------------------------------|----------------------------------|
|                                     | 1/I <sub>F</sub>                 | 30-min C-Peptide index          | Disposition index, original      | Disposition index, corrected     |
| Age                                 | 0.0237<br>Est=-0.0042            | <b>&lt;0.0001</b><br>Est=0.0143 | <b>&lt;0.0001</b><br>Est=0.0099  | 0.7755                           |
| BMI Z-score                         | <b>&lt;0.0001</b><br>Est=-0.2257 | <b>&lt;0.0001</b><br>Est=0.1234 | <b>&lt;0.0001</b><br>Est=-0.1087 | <b>&lt;0.0001</b><br>Est=-0.5451 |
| Ethnicity (Non-Hispanic v Hispanic) | 0.0264                           | 0.1582                          | 0.7350                           | 0.0906                           |
| Sex (Male v Female)                 | 0.0229                           | 0.5363                          | 0.5697                           | 0.0581                           |
| <i>TCF7L2</i> (1 or 2 v 0 alleles)  | 0.2507                           | 0.8675                          | 0.7224                           | 0.5040                           |

All models have been adjusted for age, BMI- Z-score, ethnicity and sex. Numbers represent p-values except where noted. Regression model parameter estimates (Est) are given for statistically significant relationships. P-values under the Bonferroni-corrected level of significance of p-values <0.0086 are bolded.

**Table S4-C.** Multivariable Analysis for Each Dependent Outcome (Adults, Ages 18 Years Old or Older, N=283)

| Predictor                           | Dependent outcome                |                        |                              |                                  |
|-------------------------------------|----------------------------------|------------------------|------------------------------|----------------------------------|
|                                     | 1/I <sub>F</sub>                 | 30-min C-peptide index | Disposition index, original  | Disposition index, corrected     |
| Age                                 | 0.0474                           | 0.4237                 | 0.4163                       | 0.1017                           |
| BMI Z-score                         | <b>&lt;0.0001</b><br>Est=-0.3429 | 0.0720                 | <b>0.0056</b><br>Est=-0.2230 | <b>&lt;0.0001</b><br>Est=-0.9159 |
| Ethnicity (Non-Hispanic v Hispanic) | 0.0482                           | 0.4328                 | 0.1546                       | 0.0470                           |
| Sex (Male v Female)                 | 0.6748                           | 0.4708                 | 0.0295                       | 0.3886                           |
| <i>TCF7L2</i> (1 or 2 v 0 alleles)  | 0.1627                           | 0.5197                 | 0.2960                       | 0.1508                           |

All models have been adjusted for age, BMI- z-score, ethnicity and sex. Numbers represent p-values except where noted. Regression model parameter estimates (Est) are given for statistically significant relationships. P-values under the Bonferroni-corrected level of significance of p-values <0.0086 are bolded

**Table S4-D.** Multivariable Analysis for Each Dependent Outcome (Children, Ages <18 Years Old, N=739)

| Predictor                           | Dependent outcome                |                                 |                              |                                  |
|-------------------------------------|----------------------------------|---------------------------------|------------------------------|----------------------------------|
|                                     | 1/I <sub>F</sub>                 | 30-min C-peptide Index          | Disposition index, original  | Disposition index, corrected     |
| Age                                 | <b>&lt;0.0001</b><br>Est=-0.0713 | <b>&lt;0.0001</b><br>Est=0.0656 | 0.5021                       | <b>&lt;0.0001</b><br>Est=-0.1467 |
| BMI Z-score                         | <b>&lt;0.0001</b><br>Est=-0.2073 | <b>&lt;0.0001</b><br>Est=0.1434 | <b>0.0008</b><br>Est=-0.0905 | <b>&lt;0.0001</b><br>Est=-0.4957 |
| Ethnicity (Non-Hispanic v Hispanic) | 0.5862                           | 0.9657                          | 0.4756                       | 0.9959                           |
| Sex (Male v Female)                 | <b>&lt;0.0001</b><br>Est=0.1693  | 0.4261                          | <b>0.0081</b><br>Est=0.1601  | <b>&lt;0.0001</b><br>Est=0.5034  |
| <i>TCF7L2</i> (1 or 2 v 0 alleles)  | 0.2735                           | 0.4993                          | 0.8338                       | 0.3892                           |

All models have been adjusted for age, BMI- z-score, ethnicity and sex. Numbers represent p-values except where noted. Regression model parameter estimates (Est) are given for statistically significant relationships. P-values under the Bonferroni-corrected level of significance of p-values <0.0086 are bolded.

Supplementary Table S5: Comparison of 2 versus 0 alleles in unrelated participants only (n=1,022). For families with more than one relative, only one relative, selected at random, has been included.

**Table S5-A.** Univariable Analysis (N=575)

| Predictor                           | 1/I <sub>F</sub>                       | 30-min C-peptide index                | Disposition index (original)       | Disposition index (corrected)          |
|-------------------------------------|----------------------------------------|---------------------------------------|------------------------------------|----------------------------------------|
| Age                                 | <b>&lt;0.0001</b><br><i>r</i> =-0.3328 | <b>&lt;0.0001</b><br><i>r</i> =0.4032 | 0.1746<br><i>r</i> =0.0684         | <b>&lt;0.0001</b><br><i>r</i> =-0.2076 |
| BMI Z-score                         | <b>&lt;0.0001</b><br><i>r</i> =-0.3940 | <b>&lt;0.0001</b><br><i>r</i> =0.2686 | <b>0.0707</b><br><i>r</i> =-0.0948 | <b>&lt;0.0001</b><br><i>r</i> =-0.3035 |
| Ethnicity (Non-Hispanic v Hispanic) | <b>0.0212</b><br>NH > H                | 0.0559<br>NH > H                      | 0.8654                             | <b>0.1612</b>                          |
| Sex (Male v Female)                 | 0.0371                                 | 0.0081                                | 0.9136                             | 0.1040                                 |
| <i>TCF7L2</i> (2 v 0 alleles)       | 0.1277                                 | 0.3695                                | 0.2009                             | 0.1577                                 |

Numbers represent p-values except where noted. For statistically significant correlations, Spearman correlation coefficients (*r*) are shown for continuous variables and direction of difference for categorical variables. P-values under the Bonferroni-corrected level of significance of p-values <0.0086 are bolded.

**Table S5-B.** Multivariable Analysis for Each Dependent Outcome (All Ages, N=575)

| Predictor                           | Dependent outcome                |                                 |                              |                                  |
|-------------------------------------|----------------------------------|---------------------------------|------------------------------|----------------------------------|
|                                     | 1/I <sub>F</sub>                 | 30-min C-Peptide index          | Disposition index, original  | Disposition index, corrected     |
| Age                                 | 0.2560                           | <b>&lt;0.0001</b><br>Est=0.0170 | <b>0.0001</b><br>Est=0.0134  | 0.3951                           |
| BMI Z-score                         | <b>&lt;0.0001</b><br>Est=-0.2088 | <b>0.0002</b><br>Est=0.1134     | <b>0.0076</b><br>Est=-0.1057 | <b>&lt;0.0001</b><br>Est=-0.5059 |
| Ethnicity (Non-Hispanic v Hispanic) | 0.1766                           | 0.1659                          | 0.8484                       | 0.3322                           |
| Sex (Male v Female)                 | 0.0434                           | 0.6915                          | 0.3876                       | 0.0825                           |
| <i>TCF7L2</i> (2 v 0 alleles)       | 0.1655                           | 0.4839                          | 0.4275                       | 0.1805                           |

All models have been adjusted for age, BMI- Z-score, ethnicity and sex. Numbers represent p-values except where noted. Regression model parameter estimates (Est) are given for statistically significant relationships. P-values under the Bonferroni-corrected level of significance of p-values <0.0086 are bolded.

**Table S5-C.** Multivariable Analysis for Each Dependent Outcome (Adults, Ages 18 Years Old or Older, N=154)

| Predictor                           | Dependent outcome                |                        |                             |                              |
|-------------------------------------|----------------------------------|------------------------|-----------------------------|------------------------------|
|                                     | 1/I <sub>F</sub>                 | 30-min C-peptide index | Disposition index, original | Disposition index, corrected |
| Age                                 | 0.3103                           | 0.8711                 | 0.3934                      | 0.3314                       |
| BMI Z-score                         | <b>&lt;0.0001</b><br>Est=-0.3947 | 0.0341<br>Est=0.1635   | <b>0.1134</b>               | <b>0.0006</b><br>Est=-1.0180 |
| Ethnicity (Non-Hispanic v Hispanic) | 0.0228<br>Est=-0.5415            | 0.2552                 | 0.1644                      | 0.0389<br>Est=-1.8497        |
| Sex (Male v Female)                 | 0.8636                           | 0.5403                 | 0.1589                      | 0.4807                       |
| <i>TCF7L2</i> (2 v 0 alleles)       | 0.3729                           | 0.3596                 | 0.9897                      | 0.5462                       |

All models have been adjusted for age, BMI- z-score, ethnicity and sex. Numbers represent p-values except where noted. Regression model parameter estimates (Est) are given for statistically significant relationships. P-values under the Bonferroni-corrected level of significance of p-values <0.0086 are bolded.

**Table S5-D.** Multivariable Analysis for Each Dependent Outcome (Children, Ages <18 Years Old, N=421)

| Predictor                                  | Dependent outcome                |                                 |                              |                                  |
|--------------------------------------------|----------------------------------|---------------------------------|------------------------------|----------------------------------|
|                                            | 1/I <sub>F</sub>                 | 30-min C-peptide Index          | Disposition index, original  | Disposition index, corrected     |
| <b>Age</b>                                 | <b>&lt;0.0001</b><br>Est=-0.0700 | <b>&lt;0.0001</b><br>Est=0.0666 | 0.6958                       | <b>&lt;0.0001</b><br>Est=-0.1465 |
| <b>BMI Z-score</b>                         | <b>&lt;0.0001</b><br>Est=-0.1967 | <b>0.0002</b><br>Est=0.1192     | <b>0.0111</b><br>Est=-0.0959 | <b>&lt;0.0001</b><br>Est=-0.4818 |
| <b>Ethnicity (Non-Hispanic v Hispanic)</b> | 0.7701                           | 0.6597                          | 0.3726                       | 0.4451                           |
| <b>Sex (Male v Female)</b>                 | <b>0.0003</b><br>Est=0.2056      | 0.4365                          | <b>0.0177</b><br>Est=0.1918  | <b>0.0003</b><br>Est=0.5895      |
| <b>TCF7L2 (2 v 0 alleles)</b>              | 0.0430                           | 0.7669                          | 0.3544                       | 0.0515                           |

All models have been adjusted for age, BMI- z-score, ethnicity and sex. Numbers represent p-values except where noted. Regression model parameter estimates (Est) are given for statistically significant relationships. P-values under the Bonferroni-corrected level of significance of p-values <0.0086 are bolded.

Supplementary Table S6: Analysis with non-Hispanic White, unrelated participants only (n=839). For families with more than one relative, only one relative, selected at random, has been included.

**Table S6-A.** Univariable Analysis (N=839)

| Predictor                          | 1/I <sub>F</sub>                       | 30-min C-peptide index                | Disposition index (original)       | Disposition index (corrected)          |
|------------------------------------|----------------------------------------|---------------------------------------|------------------------------------|----------------------------------------|
| Age                                | <b>&lt;0.0001</b><br><i>r</i> =-0.3333 | <b>&lt;0.0001</b><br><i>r</i> =0.3716 | 0.0957<br><i>r</i> =0.0702         | <b>&lt;0.0001</b><br><i>r</i> =-0.2045 |
| BMI Z-score                        | <b>&lt;0.0001</b><br><i>r</i> =-0.4435 | <b>&lt;0.0001</b><br><i>r</i> =0.2618 | <b>0.0003</b><br><i>r</i> =-0.1560 | <b>&lt;0.0001</b><br><i>r</i> =-0.3740 |
| Sex (Male v Female)                | 0.5063                                 | 0.0952                                | 0.6853                             | 0.7189                                 |
| <b>TCF7L2 (1 or 2 v 0 alleles)</b> | 0.0926                                 | 0.6879                                | 0.5786                             | 0.0976                                 |

Numbers represent p-values except where noted. For statistically significant correlations, Spearman correlation coefficients (*r*) are shown for continuous variables and direction of difference for categorical variables. P-values under the Bonferroni-corrected level of significance of p-values <0.0086 are bolded.

**Table S6-B.** Multivariable Analysis for Each Dependent Outcome (All Ages, N=839)

| Predictor                          | Dependent outcome                |                                 |                                 |                                  |
|------------------------------------|----------------------------------|---------------------------------|---------------------------------|----------------------------------|
|                                    | 1/I <sub>F</sub>                 | 30-min C-Peptide index          | Disposition index, original     | Disposition index, corrected     |
| Age                                | 0.0761                           | <b>&lt;0.0001</b><br>Est=0.0143 | <b>&lt;0.0001</b><br>Est=0.0109 | 0.4853                           |
| BMI Z-score                        | <b>&lt;0.0001</b><br>Est=-0.2262 | <b>&lt;0.0001</b><br>Est=0.1258 | <b>0.0003</b><br>Est=-0.1079    | <b>&lt;0.0001</b><br>Est=-0.5427 |
| Sex (Male v Female)                | 0.1360                           | 0.9501                          | 0.7349                          | 0.2162                           |
| <b>TCF7L2 (1 or 2 v 0 alleles)</b> | 0.0630                           | 0.5706                          | 0.6092                          | 0.2653                           |

All models have been adjusted for age, BMI- Z-score, ethnicity and sex. Numbers represent p-values except where noted. Regression model parameter estimates (Est) are given for statistically significant relationships. P-values under the Bonferroni-corrected level of significance of p-values <0.0086 are bolded.

**Table S6-C.** Multivariable Analysis for Each Dependent Outcome (Adults, Ages 18 Years Old or Older, N=234)

| Predictor                          | Dependent outcome                |                        |                              |                                  |
|------------------------------------|----------------------------------|------------------------|------------------------------|----------------------------------|
|                                    | 1/I <sub>F</sub>                 | 30-min C-peptide index | Disposition index, original  | Disposition index, corrected     |
| Age                                | 0.0169                           | 0.3864                 | 0.2449                       | 0.0360                           |
| BMI Z-score                        | <b>&lt;0.0001</b><br>Est=-0.3655 | 0.1247                 | <b>0.0014</b><br>Est=-0.2831 | <b>&lt;0.0001</b><br>Est=-1.0206 |
| Sex (Male v Female)                | 0.8699                           | 0.8042                 | 0.0258                       | 0.1995                           |
| <b>TCF7L2 (1 or 2 v 0 alleles)</b> | 0.1221                           | 0.7606                 | 0.2158                       | 0.1058                           |

All models have been adjusted for age, BMI- z-score, ethnicity and sex. Numbers represent p-values except where noted. Regression model parameter estimates (Est) are given for statistically significant relationships. P-values under the Bonferroni-corrected level of significance of p-values <0.0086 are bolded.

**Table S6-D.** Multivariable Analysis for Each Dependent Outcome (Children, Ages <18 Years Old, N=605)

| Predictor | Dependent outcome |                        |                             |                              |
|-----------|-------------------|------------------------|-----------------------------|------------------------------|
|           | 1/I <sub>F</sub>  | 30-min C-peptide Index | Disposition index, original | Disposition index, corrected |

|                                           |                                  |                                 |                              |                                  |
|-------------------------------------------|----------------------------------|---------------------------------|------------------------------|----------------------------------|
| <b>Age</b>                                | <b>&lt;0.0001</b><br>Est=-0.0698 | <b>&lt;0.0001</b><br>Est=0.0616 | 0.5187                       | <b>&lt;0.0001</b><br>Est=-0.1434 |
| <b>BMI Z-score</b>                        | <b>&lt;0.0001</b><br>Est=-0.2034 | <b>&lt;0.0001</b><br>Est=0.1443 | <b>0.0088</b><br>Est=-0.0771 | <b>&lt;0.0001</b><br>Est=-0.4701 |
| <b>Sex (Male v Female)</b>                | <b>&lt;0.0001</b><br>Est=0.1546  | 0.6242                          | 0.0153<br>Est=0.1585         | <b>0.0006</b><br>Est=0.4650      |
| <b><i>TCF7L2</i> (1 or 2 v 0 alleles)</b> | 0.0397<br>Est=0.0967             | 0.9382                          | 0.9149                       | 0.1337                           |

All models have been adjusted for age, BMI- z-score, ethnicity and sex. Numbers represent p-values except where noted. Regression model parameter estimates (Est) are given for statistically significant relationships. P-values under the Bonferroni-corrected level of significance of p-values <0.0086 are bolded.
